# Supplementary material
Source: PubMed Central journal article supplement (PMC3571300)

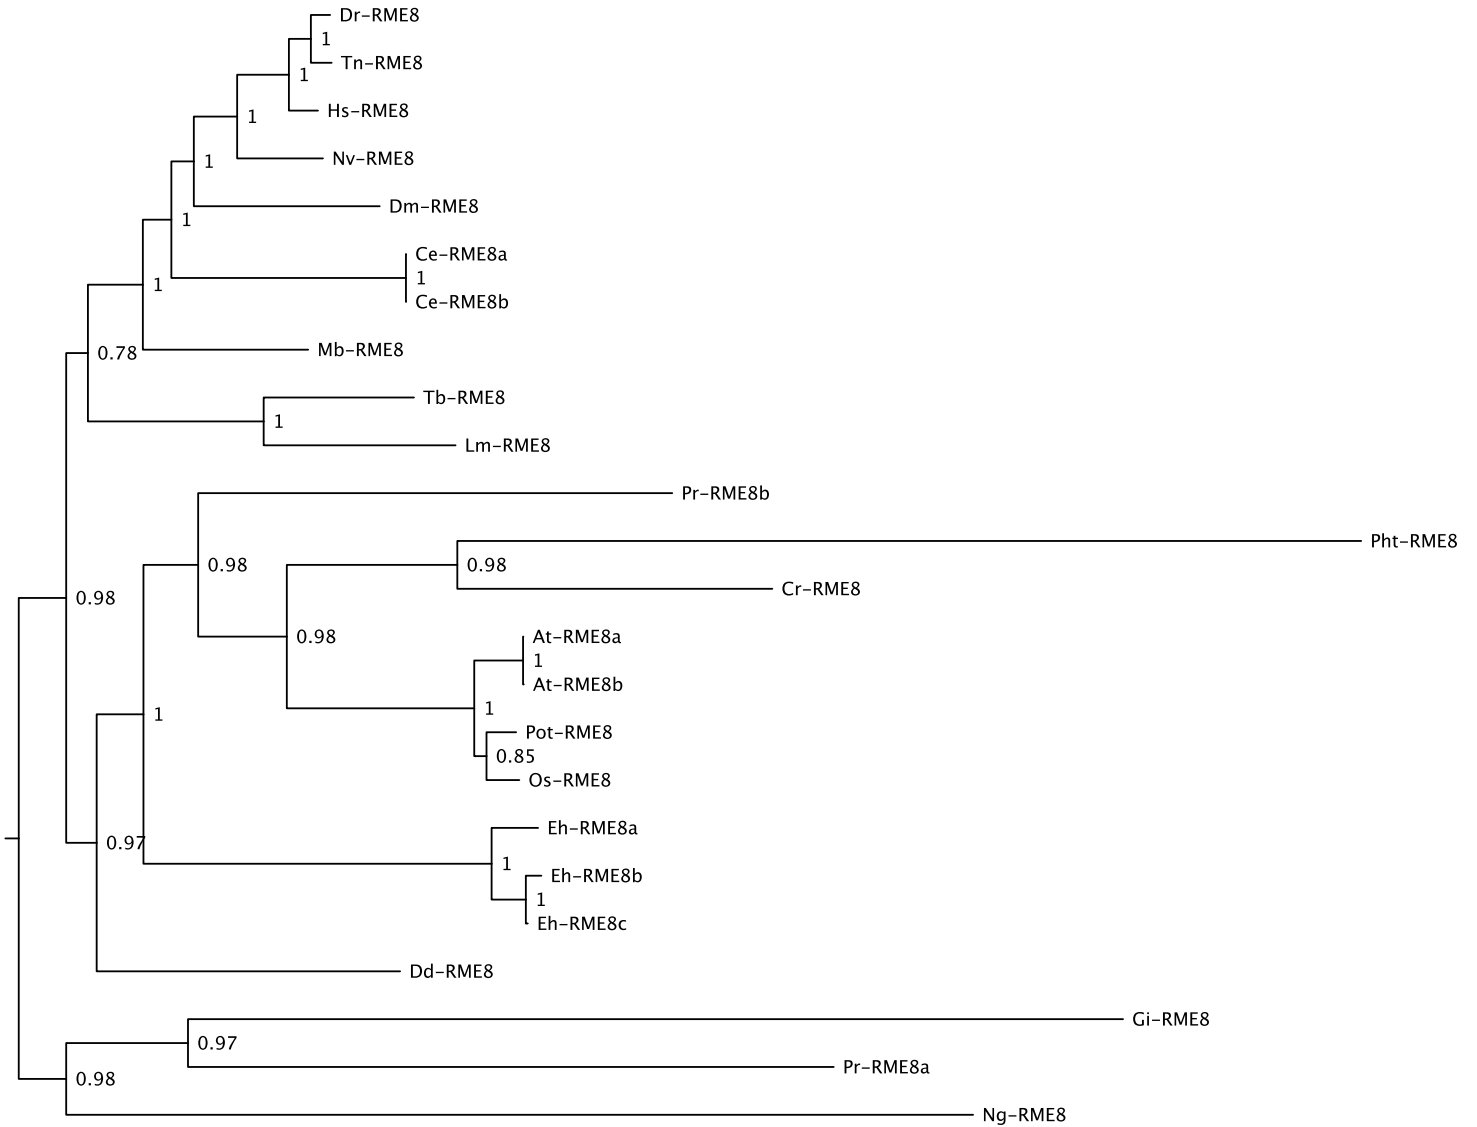

0.4

## Control

## Induced

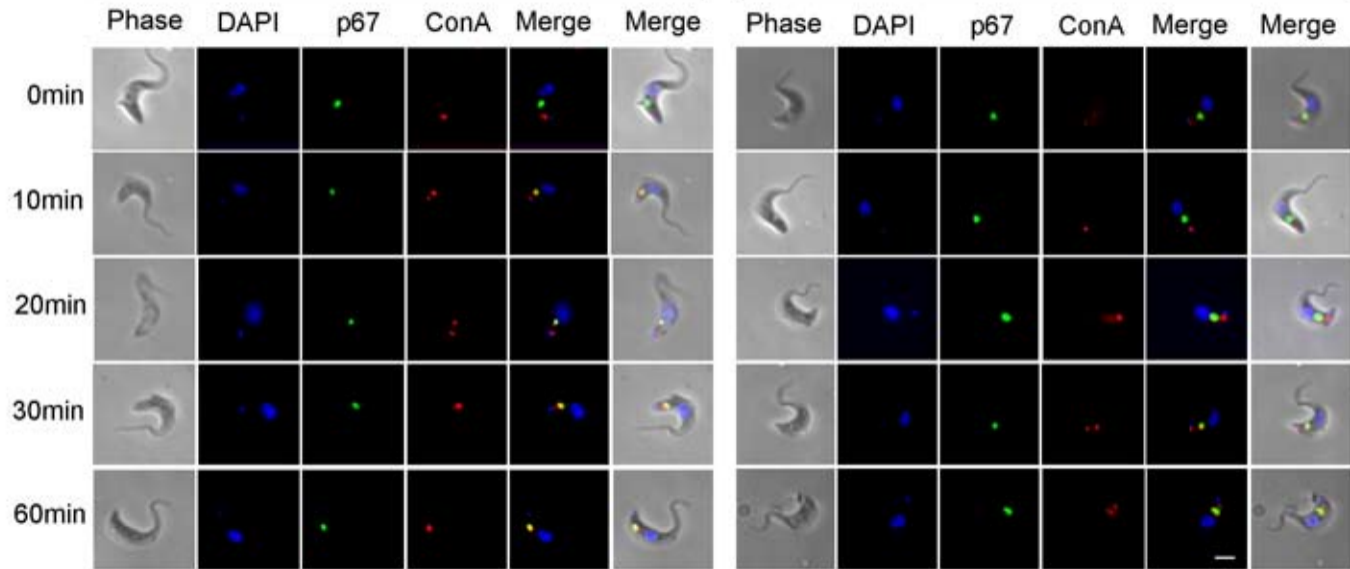

Supplement: EC.00273-12_zek999094054so3.pdf [file EC.00273-12_zek999094054so3.pdf]
